# Supplementary material for: Spermidine restores dysregulated autophagy and polyamine synthesis in aged and osteoarthritic chondrocytes via EP300
Source: PubMed Central journal article supplement (PMC6145946; doi:10.1038/s12276-018-0149-3), 2018-09-19
Supplement: 12276_2018_149_MOESM1_ESM.pdf [file 12276_2018_149_MOESM1_ESM.pdf]

# Supplementary figure 1

A

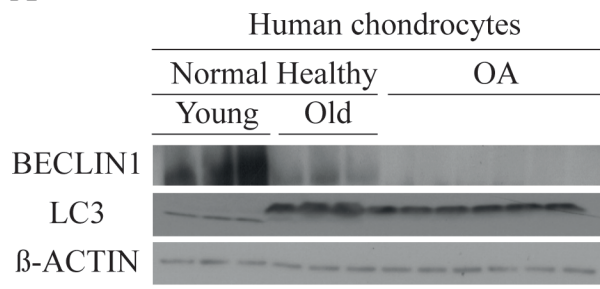

B

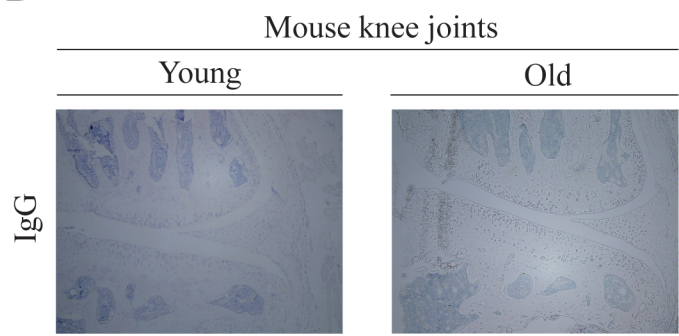

**Supplementary Figure 1 - Autophagy markers *in vivo*.**

**(A)** Autophagy protein expression in isolated chondrocytes from young healthy (21-37yrs), old (62-68yrs) and OA (49-86yrs) knee joints. **(B)** Representative images (x20) of rabbit IgG (used in immunohistochemistry experiment) control staining of knee joints from WT mice at young (2 months) or old (16 months) of age.

# Supplementary figure 2

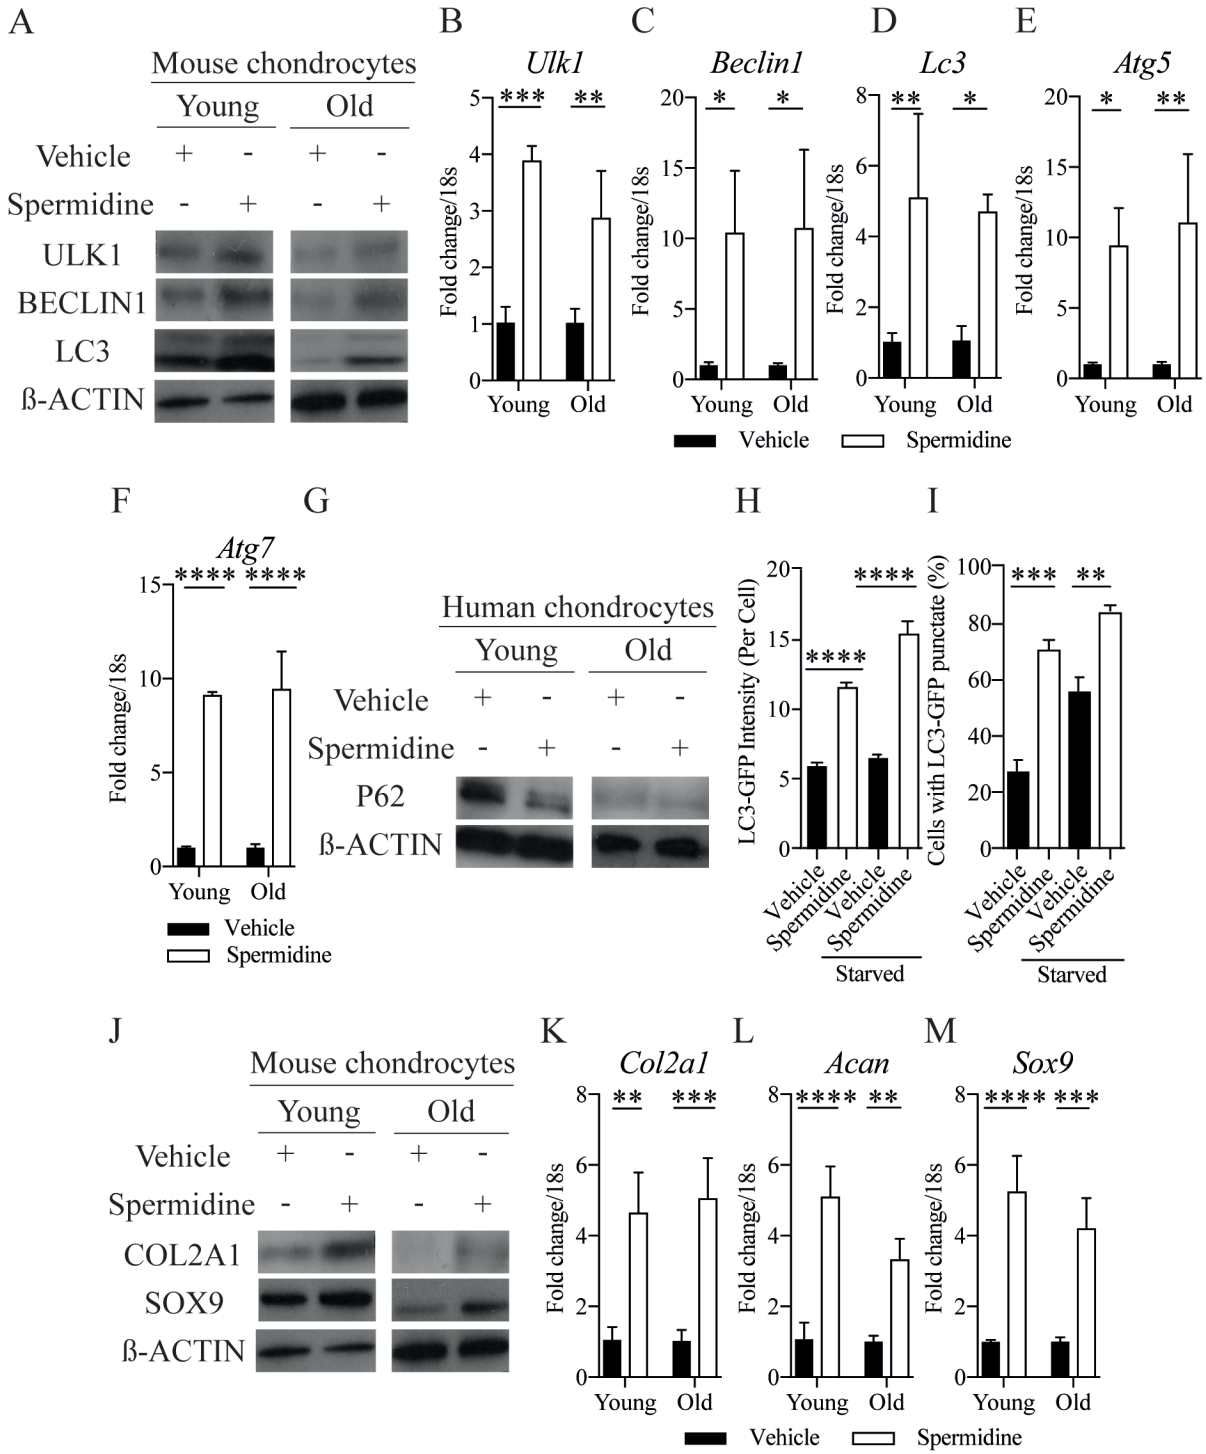

**Supplementary Figure 2 - The effect of spermidine treatment on autophagy and chondrogenesis markers.** **(A)** Representative western blot and **(B-F)** gene expression (RT-qPCR) of key autophagy proteins in avulsed femoral heads from WT young (2 months) or old (16 months) mice treated with either spermidine (100 nM) or DMSO treatment for 2 h ( $n=3$ ). **(G)** Representative western blot showing P62 protein expression in isolated chondrocytes from young (21-37 yrs) and old (62-68 yrs) knee joints treated with DMSO control or spermidine (100 nM) for 2 h. **(H)** Qualification of total LC3-GFP intensity and **(I)** percentage of chondrocytes with LC3 positive punctate from avulsed femoral heads from LC3-GFP mice treated with either DMSO control or spermidine (100 nM) for 2 h before fixation in serum or serum free media ( $n=15-37$  cells from 3 mice per treatment group). **(J)** Representative western blot and **(K-M)** gene expression (RT-qPCR) of key chondrogenesis markers in avulsed femoral heads from WT young (2 months) or old (16 months) mice treated with either spermidine (100 nM) or DMSO treatment for 2 h ( $n=3$ ). All RT-qPCR gene expressions were normalised to the endogenous level of 18s. All data are expressed as mean  $\pm$  S.E.M of  $n$  observations. ANOVA with Tukeys comparison was used for statistical analysis. NS= non-significant.  $p < 0.05$ ,  $p < 0.01$ ,  $p < 0.001$  or  $p < 0.0001$  represented in all tables and Figures as \*, \*\*, \*\*\* or \*\*\*\* respectively.

# Supplementary figure 3

A

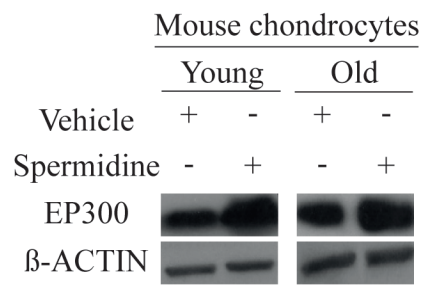

B

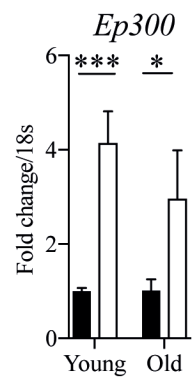

**Supplementary Figure 3 - Spermidine activates EP300 in murine chondrocytes. (A)**

Representative western blot and **(B)** gene expression (RT-qPCR) of EP300 in avulsed femoral heads from WT young (2 months) or old (16 months) mice treated with either spermidine (100 nM) or DMSO treatment for 2 h ( $n=3$ ). RT-qPCR gene expression was normalised to the endogenous level of 18s. All data are expressed as mean  $\pm$  S.E.M of  $n$  observations. ANOVA with Tukeys comparison was used for statistical analysis.  $p < 0.05$  or  $p < 0.001$  represented in Figures as \* or \*\*\* respectively.
